# Supplementary material for: Entropy-Driven Crystallization of Hard Colloidal Mixtures of Polymers and Monomers
Source: Preprints.org preprint supplement (doi:10.20944/preprints202407.0786.v1), 2024-07-10
Supplement: Supplementary file 3 [file supplementary]

CCE analysis,  $x = 0.8$ ,  $\phi = 0.56$

This area requires a 3D PDF enabled viewer such as Adobe Reader.
