# Supplementary material for: Entropy-Driven Crystallization of Hard Colloidal Mixtures of Polymers and Monomers
Source: Preprints.org preprint supplement (doi:10.20944/preprints202407.0786.v1), 2024-07-10
Supplement: Supplementary file 11 [file supplementary]

$$\phi = 0.5575, x = 0.9$$

This area requires a 3D PDF enabled viewer such as Adobe Reader.
