# Supplementary material for: Entropy-Driven Crystallization of Hard Colloidal Mixtures of Polymers and Monomers
Source: Preprints.org preprint supplement (doi:10.20944/preprints202407.0786.v1), 2024-07-10
Supplement: Supplementary file 14 [file supplementary]

## SUPPLEMENTARY MATERIALS

# Entropy-Driven Crystallization of Hard Colloidal Mixtures of Polymers and Monomers

Olia Bouzid <sup>1</sup>, Daniel Martínez-Fernández <sup>1</sup>, Miguel Herranz <sup>1</sup> and Nikos Ch. Karayiannis <sup>1,\*</sup>

Institute for Optoelectronic Systems and Microtechnology (ISOM) and Escuela Técnica Superior de Ingenieros Industriales (ETSII), Universidad Politécnica de Madrid (UPM), José Gutierrez Abascal 2, 28006 Madrid, Spain; [olia.bouzid@alumnos.upm.es](mailto:olia.bouzid@alumnos.upm.es) (OB); [daniel.martinez.fernandez@upm.es](mailto:daniel.martinez.fernandez@upm.es) (D.M.F); [miguel.herranzf@upm.es](mailto:miguel.herranzf@upm.es) (M.H.)

\* Correspondence: [n.karayiannis@upm.es](mailto:n.karayiannis@upm.es); Tel.: +34-910677318

**Figure S1** shows the distribution of the shape measures for the mixtures at  $\phi = 0.57$  and for compositions  $x = 0.02, 0.10, 0.50$  and  $1$ . In all cases the distributions are calculated over all sites, independent of being individual ones or part of chains.

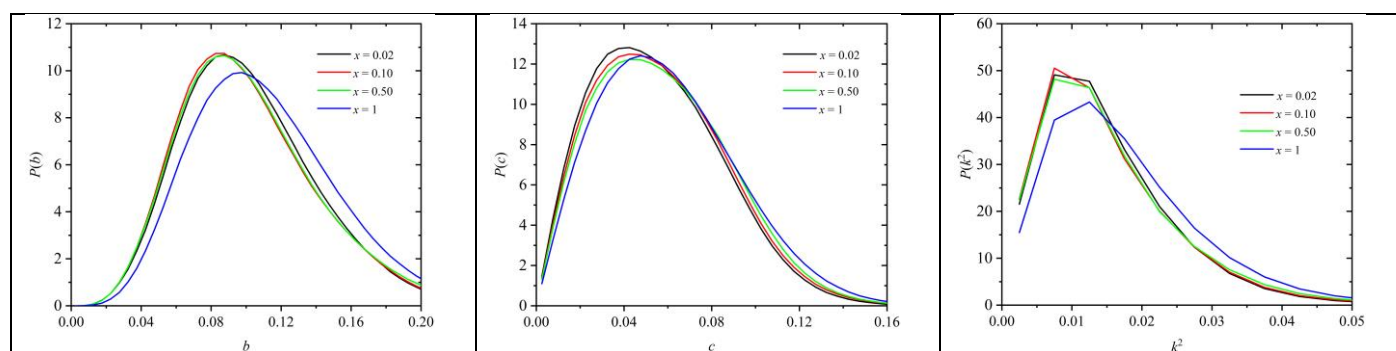

**Figure S1.** Probability distribution function for asphericity (left panel), acylindricity (middle panel) and relative shape anisotropy (right panel) of the Voronoi polyhedra, as calculated over all spheres in the final, stable part of the MC trajectory at  $\phi = 0.57$ . The corresponding degrees of crystallinity are  $\tau = 0.72$  ( $x = 0.02$ ),  $0.71$  ( $x = 0.10$ ),  $0.64$  ( $x = 0.50$ ), and  $0.40$  ( $x = 1$ ).
