# Supplementary material for: Entropy-Driven Crystallization of Hard Colloidal Mixtures of Polymers and Monomers
Source: Preprints.org preprint supplement (doi:10.20944/preprints202407.0786.v1), 2024-07-10
Supplement: Supplementary file 22 [file supplementary]

$$x = 0.50, \text{ phi} = 0.5525$$

This area requires a 3D PDF enabled viewer such as Adobe Reader.
